# Supplementary material for: Whole‐exome sequencing of ovarian cancer families uncovers putative predisposition genes
Source: PubMed Central journal article supplement — Int J Cancer. 2019 Jul 16;146(8):2147–55. doi: 10.1002/ijc.32545 (PMC7065147; doi:10.1002/ijc.32545), 2019-07-16
Supplement: IJC-146-2147-s004.pdf [file IJC-146-2147-s004.pdf]

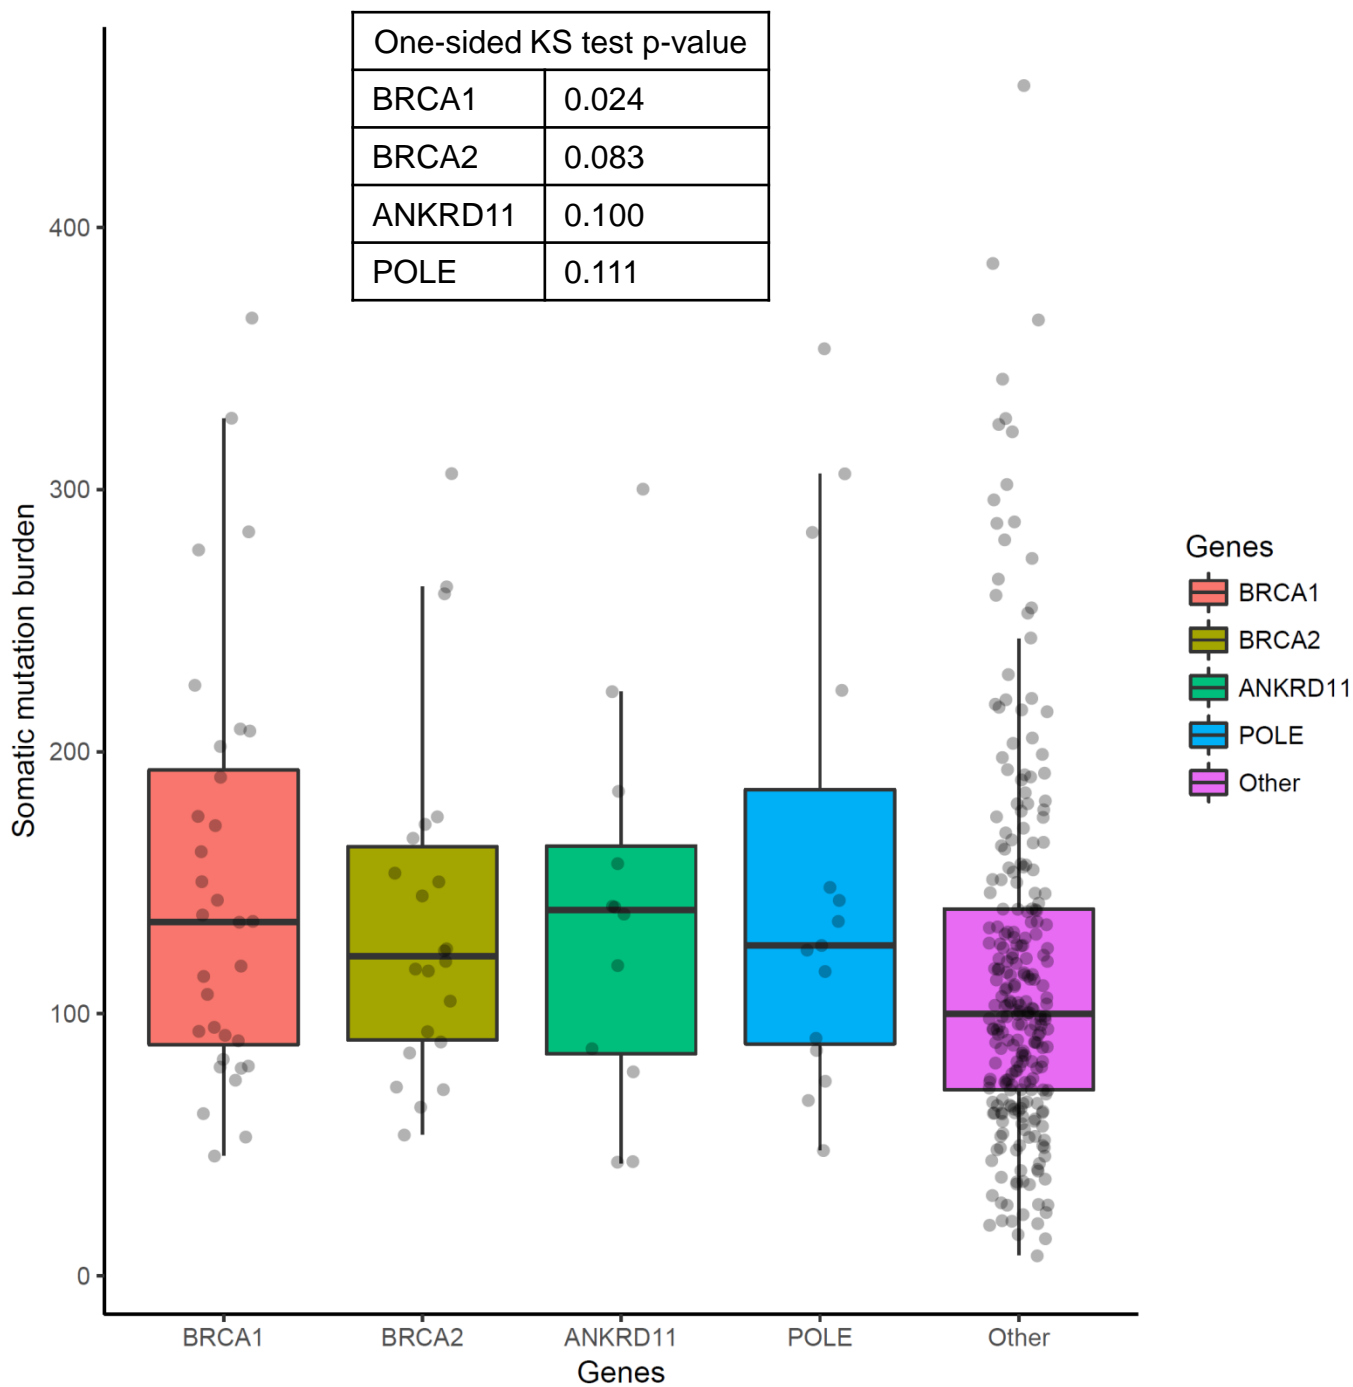

**Supplemental Figure 1. Somatic mutation burden in TCGA OC cohort.** The number of somatic mutations in patients who carried germline mutations in each of the four genes was compared with patients that did not carry germline mutations in any of the four genes (“Other”) using Kolmogorov–Smirnov (KS) test.
